# Supplementary material
Source: MDPI journal article supplement (https://www.mdpi.com/2072-4292/16/5/798)
Supplement: s1 [file s1]

### Accuracy Assessment

**Table S1. Producer's Accuracy (PA) and User's Accuracy (UA) results for 2014 classifications for all LULC classes using RF, NL and SVM algorithms.**

| Year | LULC                         | RF     |        | ML     |        | SVM    |        |
|------|------------------------------|--------|--------|--------|--------|--------|--------|
|      |                              | UA (%) | PA (%) | UA (%) | PA (%) | UA (%) | PA (%) |
| 1994 | Bare soil                    | 93.47  | 78.18  | 89.13  | 74.54  | 80.39  | 74.54  |
|      | Rainfed crops                | 88.7   | 100    | 56.66  | 92.72  | 63.26  | 56.36  |
|      | Irrigated crops              | 83.07  | 98.18  | 75.0   | 98.18  | 68.83  | 96.36  |
|      | Grassland                    | 83.33  | 100    | 77.5   | 56.36  | 71.79  | 50.90  |
|      | <i>Dichrostachys cinerea</i> | 93.87  | 83.63  | 86.48  | 58.18  | 83.78  | 56.36  |
|      | Mangrove                     | 100    | 100    | 93.22  | 100    | 96.49  | 100    |
|      | Flood-prone areas            | 80.88  | 100    | 64.1   | 90.9   | 47.52  | 87.27  |
|      | Infrastructure               | 100    | 58.18  | 100    | 30.9   | 94.11  | 29.09  |
|      | Woodland                     | 94.54  | 94.54  | 81.48  | 80.0   | 82.81  | 96.36  |
|      | Water                        | 100    | 96.36  | 96.49  | 100    | 94.82  | 100    |

**Table S2. Producer's Accuracy (PA) and User's Accuracy (UA) results for 2022 classifications for all LULC classes using RF, NL and SVM algorithms.**

| Year | LULC                         | RF     |        | ML     |        | SVM    |        |
|------|------------------------------|--------|--------|--------|--------|--------|--------|
|      |                              | UA (%) | PA (%) | UA (%) | PA (%) | UA (%) | PA (%) |
| 2022 | Bare soil                    | 96.42  | 98.18  | 71.83  | 92.72  | 89.09  | 75.38  |
|      | Rainfed crops                | 96.49  | 100    | 82.0   | 74.54  | 71.42  | 36.36  |
|      | Irrigated crops              | 84.61  | 100    | 75.0   | 76.36  | 71.15  | 67.27  |
|      | Grassland                    | 100    | 90.9   | 56.38  | 96.36  | 41.6   | 94.5   |
|      | <i>Dichrostachys cinerea</i> | 96.42  | 98.18  | 74.57  | 80.0   | 80.0   | 64.7   |

|  |                   |       |       |       |       |       |       |
|--|-------------------|-------|-------|-------|-------|-------|-------|
|  | Mangrove          | 100   | 98.18 | 87.09 | 98.18 | 89.83 | 96.36 |
|  | Flood-prone areas | 90.69 | 70.9  | 80.48 | 60.0  | 75.0  | 60.0  |
|  | Infrastructure    | 90.0  | 98.18 | 88.88 | 43.63 | 100   | 36.36 |
|  | Woodland          | 98.14 | 96.36 | 86.11 | 56.36 | 88.23 | 54.54 |
|  | Water             | 100   | 100   | 100   | 98.18 | 98.18 | 98.18 |

*Table S3: Confusion matrix obtained from the validation of the classification carried out with the RF algorithm in 1994 in the province of Ciego de Ávila.*

[illegible]

*Table S4: Confusion matrix obtained from the validation of the classification carried out with the ML algorithm in 1994 in the province of Ciego de Ávila.*

[illegible]

*Table S5: Confusion matrix obtained from the validation of the classification carried out with the SVM algorithm in 1994 in the province of Ciego de Ávila.*

[illegible]





Table S8: Confusion matrix obtained from the validation of the classification carried out with the SVM algorithm in 2022 in the province of Ciego de Ávila.

[illegible]
